# Supplementary material for: Finding and extending ancient simple sequence repeat-derived regions in the human genome
Source: Mob DNA. 2020 Feb 17;11:11. doi: 10.1186/s13100-020-00206-y (PMC7027126; doi:10.1186/s13100-020-00206-y)
Supplement: Supplementary file 6 — Additional file 6: Table S1. Summary statistics of perfect SSR loci in hg38 for each SSR family. [file 13100_2020_206_MOESM6_ESM.xlsx]

## Sheet: test_cloud_info
Table S1. SSR-clouds construction summary
Motif1	Number of Training Loci2	Cloud Threshold Fold-Reduction3	Threshold Counts4					Stringency specific Oligonucleotide Counts5
			Cloud 1 (High Stringency)	Cloud 2 (Mid Stringency)	Cloud 3 (Mid Stringency)	Cloud 4 (Mid Stringency)	Cloud 5 (Low Stringency)	High Stringency (cloud 1 16-mers and perfect repeat 12-mers)	Mid-Stringency (clouds 2-4)	Low Stringency (cloud 5)	All Stringencies
A	632710	10.9605	158178	14432	1317	121	11	4	3774	44500	48278
AC	153656	8.25844	38414	4652	564	69	9	8	5708	48027	53743
AAAAAT	139645	8.10202	34912	4309	532	66	9	24	1716	22333	24073
AAAT	128396	7.96706	32099	4029	506	64	8	16	1778	20572	22366
AAAAT	106065	7.66836	26517	3458	451	59	8	20	1744	20537	22301
AAAAAG	104414	7.64434	26104	3415	447	59	8	24	2230	24838	27092
AAAAC	99142	7.56553	24786	3277	434	58	8	20	1754	17925	19699
AAAAG	97506	7.5404	24377	3233	429	57	8	20	2474	22699	25193
ACCTCC	96599	7.52632	24150	3209	427	57	8	24	12	1466	1502
AAAAAC	92317	7.45838	23080	3095	415	56	8	24	1290	16369	17683
AT	84257	7.32334	21065	2877	393	54	8	6	4932	31869	36807
AAAC	82417	7.29107	20605	2826	388	54	8	16	1394	11207	12617
AAAG	82179	7.28686	20545	2820	387	54	8	16	3994	24636	28646
AG	68928	7.03505	17232	2450	349	50	8	8	4238	29703	33949
AAT	62928	6.90807	15732	2278	330	48	7	12	1363	12762	14137
AAGG	44951	6.45856	11238	1740	270	42	7	16	5184	29681	34881
AATGG	43036	6.40257	10759	1681	263	41	7	20	7576	37242	44838
AAC	42645	6.39089	10662	1669	262	41	7	12	1226	7328	8566
AAAATT	38889	6.27413	9723	1550	247	40	7	24	898	12061	12983
AAAGAG	35527	6.16169	8882	1442	234	38	7	24	2596	18489	21109
AGGG	32136	6.0393	8034	1331	221	37	7	16	3800	23127	26943
AAATAT	31778	6.02578	7945	1319	219	37	7	24	1778	16294	18096
AATG	31161	6.0022	7791	1298	217	37	7	16	934	7612	8562
ACATAT	26373	5.80524	6594	1136	196	34	6	24	2899	20525	23448
AAAATG	23965	5.69513	5992	1052	185	33	6	24	182	9109	9315
AGCCTC	23287	5.66253	5822	1029	182	33	6	24	0	1835	1859
AACAG	23095	5.65316	5774	1022	181	32	6	20	16	1051	1087
ACCCCC	22985	5.64777	5747	1018	181	32	6	24	788	9851	10663
AAAAGG	22632	5.63031	5658	1005	179	32	6	24	450	9565	10039
AACTAG	21214	5.55792	5304	955	172	31	6	24	0	39	63
AGG	20610	5.52591	5153	933	169	31	6	12	1900	13837	15749
ACACAT	20268	5.50745	5067	921	168	31	6	24	2166	15253	17443
AAATT	20115	5.4991	5029	915	167	31	6	20	639	7303	7962
AAATGT	19331	5.45555	4833	886	163	30	6	24	16	3102	3142
AAAGG	19177	5.44683	4795	881	162	30	6	20	1680	12682	14382
ATCC	18896	5.43078	4724	870	161	30	6	16	2823	17735	20574
AGGGG	18819	5.42634	4705	868	160	30	6	20	1605	13622	15247
AGAGGC	18789	5.42461	4698	866	160	30	6	24	57	3531	3612
AGAGGG	18468	5.40595	4617	855	158	30	6	24	1224	10377	11625
AGAT	17201	5.32965	4301	807	152	29	6	16	1911	11841	13768
AAATG	16628	5.29366	4157	786	149	29	6	20	1041	8707	9768
AAGAGG	16363	5.27668	4091	776	147	28	6	24	976	9450	10450
AAG	16293	5.27216	4074	773	147	28	6	12	1196	7331	8539
AAACAG	16088	5.25882	4022	765	146	28	6	24	52	4375	4451
ACAT	15848	5.24304	3962	756	145	28	6	16	1796	9504	11316
AGGGGG	15644	5.22947	3911	748	144	28	6	24	728	8283	9035
AATAT	15579	5.22512	3895	746	143	28	6	20	2041	11801	13862
ACCCC	15132	5.19478	3783	729	141	27	6	20	574	5439	6033
ACAGAG	15043	5.18866	3761	725	140	27	6	24	1386	9183	10593
AAGGG	14036	5.11725	3509	686	135	27	6	20	1583	10418	12021
AAATAG	13917	5.10854	3480	682	134	27	6	24	42	4178	4244
AAATTT	13469	5.07522	3368	664	131	26	6	18	651	5453	6122
AAGAG	13252	5.05876	3313	655	130	26	6	20	540	6367	6927
AAATAC	12690	5.01511	3173	633	127	26	6	24	26	2981	3031
AGAGG	12431	4.99447	3108	623	125	25	5	20	784	8379	9183
AAGGAG	12368	4.9894	3092	620	125	25	5	24	1091	9701	10816
ACC	12366	4.98923	3092	620	125	25	5	12	1292	8807	10111
AGGCGG	12127	4.9698	3032	611	123	25	5	24	0	369	393
AAAATC	11613	4.92694	2904	590	120	25	5	24	28	4055	4107
AGCCCC	11487	4.9162	2872	585	119	25	5	24	256	6484	6764
ACTGC	11423	4.91071	2856	582	119	25	5	20	0	102	122
AAGGGG	11368	4.90597	2842	580	119	25	5	24	790	8738	9552
ACATGC	11230	4.894	2808	574	118	24	5	24	358	4207	4589
AAAACC	11135	4.88569	2784	570	117	24	5	24	270	4056	4350
AAACAC	11079	4.88077	2770	568	117	24	5	24	272	4844	5140
ACACAG	10966	4.87077	2742	563	116	24	5	24	582	6212	6818
ATC	10605	4.83827	2652	548	114	24	5	12	1108	7418	8538
ACTCC	10603	4.83809	2651	548	114	24	5	20	2298	10589	12907
AGGC	10520	4.83049	2630	545	113	24	5	16	255	3743	4014
AAAAGC	10365	4.81617	2592	539	112	24	5	24	86	4306	4416
AAAGGG	10252	4.80562	2563	534	111	24	5	24	450	6925	7399
AGGGGC	9768	4.75937	2442	514	108	23	5	24	222	4874	5120
AAACTG	9679	4.75066	2420	510	108	23	5	21	0	1281	1302
AGATAT	9677	4.75047	2420	510	108	23	5	24	1070	7748	8842
AGC	9672	4.74997	2418	510	108	23	5	12	644	5697	6353
AAATGG	9599	4.74278	2400	506	107	23	5	24	4	4223	4251
AATT	9576	4.74051	2394	506	107	23	5	12	554	3561	4127
AAAAGT	9563	4.73922	2391	505	107	23	5	24	34	4046	4104
AATATT	9279	4.71073	2320	493	105	23	5	18	433	4825	5276
AAAGAC	9092	4.69159	2273	485	104	23	5	24	22	2274	2320
AGGGC	9064	4.68869	2266	484	104	22	5	20	372	5044	5436
AGCCC	8789	4.65989	2198	472	102	22	5	20	372	4926	5318
AAATTC	8726	4.65319	2182	469	101	22	5	24	10	3828	3862
AAAACT	8604	4.64011	2151	464	100	22	5	24	26	2740	2790
ACCATC	8512	4.63014	2128	460	100	22	5	24	1392	8887	10303
AACAAT	8171	4.59244	2043	445	97	22	5	24	164	2910	3098
ACACC	7917	4.56352	1980	434	96	21	5	20	12	1745	1777
AAACAT	7914	4.56318	1979	434	96	21	5	24	52	3135	3211
AAGCAG	7856	4.55647	1964	432	95	21	5	24	40	3373	3437
AAATTG	7803	4.5503	1951	429	95	21	5	24	2	2766	2792
AATTAT	7659	4.53338	1915	423	94	21	5	18	467	5105	5590
ACAG	7641	4.53125	1911	422	94	21	5	16	994	5149	6159
ACCC	7434	4.50643	1859	413	92	21	5	16	1054	6729	7799
AAATC	7419	4.50461	1855	412	92	21	5	20	24	1818	1862
AGGGCC	7219	4.48006	1805	403	90	21	5	24	204	4757	4985
AAGAAT	7094	4.46443	1774	398	89	20	5	24	22	2531	2577
AAAGAT	7039	4.45749	1760	395	89	20	5	24	24	2325	2373
AATGAT	7008	4.45356	1752	394	89	20	5	24	146	2769	2939
AGGCCC	6993	4.45165	1749	393	89	20	5	24	58	3422	3504
AAACC	6932	4.44385	1733	390	88	20	5	20	298	2509	2827
AAAGC	6709	4.41489	1678	380	87	20	5	20	160	2826	3006
AATAG	6707	4.41462	1677	380	87	20	5	20	356	3095	3471
AGCTCC	6483	4.38473	1621	370	85	20	5	24	60	2734	2818
AGCAGG	6434	4.37809	1609	368	84	20	5	24	72	3305	3401
AAGATG	6406	4.37427	1602	367	84	20	5	24	48	2587	2659
ACTC	6386	4.37153	1597	366	84	20	5	16	657	3606	4279
AGGCC	6385	4.3714	1597	366	84	20	5	20	14	3007	3041
AGATGG	6336	4.36467	1584	363	84	20	5	24	12	1854	1890
AATGAG	6157	4.33972	1540	355	82	19	5	24	18	2235	2277
ATCCCC	6114	4.33364	1529	353	82	19	5	24	75	2551	2650
AAATGC	6036	4.32253	1509	350	81	19	5	24	8	2025	2057
AATATG	5914	4.30491	1479	344	80	19	5	24	12	2317	2353
CCCCCG	5871	4.29863	1468	342	80	19	5	24	358	3318	3700
AATTC	5772	4.28404	1443	337	79	19	5	20	229	2929	3178
AACATC	5722	4.27659	1431	335	79	19	5	24	0	391	415
AATC	5686	4.27119	1422	333	78	19	5	16	280	1848	2144
ACACCC	5587	4.25622	1397	329	78	19	5	24	226	3248	3498
ACAGCC	5548	4.25026	1387	327	77	19	5	24	22	2501	2547
AAAGTG	5526	4.24688	1382	326	77	19	5	24	4	1647	1675
AATTAG	5376	4.22357	1344	319	76	18	5	24	10	1687	1721
AGCC	5349	4.21932	1338	317	76	18	5	16	1289	4253	5558
AATCTG	5287	4.20949	1322	314	75	18	5	24	2	654	680
AACATT	5229	4.20022	1308	312	75	18	5	24	14	1657	1695
AAGTGG	5177	4.19183	1295	309	74	18	5	24	12	1103	1139
ACTGCC	5116	4.1819	1279	306	74	18	5	24	2	1243	1269
AACAAG	5064	4.17337	1266	304	73	18	5	24	26	1163	1213
ACTCCC	4997	4.16227	1250	301	73	18	5	24	16	1567	1607
AGAGAT	4990	4.1611	1248	300	73	18	5	24	279	1881	2184
AGAGC	4911	4.14784	1228	296	72	18	5	20	12	2073	2105
CCCCG	4892	4.14463	1223	296	72	18	5	20	448	3026	3494
AATAGT	4888	4.14395	1222	295	72	18	5	24	94	1374	1492
CCG	4887	4.14378	1222	295	72	18	5	12	664	2882	3558
ACAGGG	4856	4.13851	1214	294	71	18	5	24	56	1804	1884
AGATG	4849	4.13731	1213	294	71	18	5	20	426	2788	3234
AATGTG	4809	4.13047	1203	292	71	18	5	24	0	1270	1294
ACACTC	4716	4.11436	1179	287	70	17	5	24	444	3268	3736
AATCAG	4585	4.09125	1147	281	69	17	5	24	0	1376	1400
ACCCTC	4500	4.07597	1125	277	68	17	5	24	73	1728	1825
AAACCC	4497	4.07542	1125	276	68	17	5	24	2	584	610
ACAGC	4475	4.07143	1119	275	68	17	5	20	16	1173	1209
ACAGGC	4462	4.06906	1116	275	68	17	5	24	4	738	766
AAGGCC	4457	4.06815	1115	274	68	17	5	24	20	707	751
AACAGC	4442	4.0654	1111	274	68	17	5	24	130	1109	1263
AGCATC	4414	4.06027	1104	272	67	17	5	24	148	1078	1250
AAAGGC	4400	4.05769	1100	272	67	17	5	24	0	1057	1081
AGAGCC	4340	4.04656	1085	269	67	17	5	24	6	1389	1419
AACCCC	4299	4.03889	1075	267	66	17	5	24	76	1653	1753
ACTCTC	4262	4.03191	1066	265	66	17	5	24	50	888	962
AGGATG	4257	4.03096	1065	265	66	17	5	24	67	1268	1359
AATGGG	4248	4.02926	1062	264	66	17	5	24	0	993	1017
AAATCT	4158	4.01204	1040	260	65	17	5	24	6	1118	1148
AAACT	4126	4.00584	1032	258	65	17	5	20	94	945	1059
AACAGG	4088	3.99844	1022	256	64	16	4	24	0	1261	1285
AGCTC	4029	3.98683	1008	253	64	16	4	20	113	2197	2330
AAATCC	3970	3.97508	993	250	63	16	4	24	0	1507	1531
AATAC	3961	3.97328	991	250	63	16	4	20	84	1658	1762
AATCAT	3936	3.96825	984	248	63	16	4	24	22	1680	1726
AAGAGC	3919	3.96482	980	248	63	16	4	24	18	1307	1349
AACCTC	3911	3.9632	978	247	63	16	4	24	0	46	70
AACC	3903	3.96157	976	247	63	16	4	16	356	2086	2458
AATTAC	3868	3.95444	967	245	62	16	4	24	4	1544	1572
AATGAC	3845	3.94973	962	244	62	16	4	24	18	1628	1670
AATATC	3840	3.9487	960	244	62	16	4	24	0	1314	1338
AATGT	3825	3.94561	957	243	62	16	4	20	76	2323	2419
AGGCCG	3794	3.93919	949	241	62	16	4	24	6	270	300
AGCTGC	3785	3.93732	947	241	62	16	4	18	78	2587	2683
AAGCTG	3715	3.92265	929	237	61	16	4	24	2	1273	1299
AAAGCC	3695	3.91842	924	236	61	16	4	24	0	1197	1221
AAGATC	3629	3.90432	908	233	60	16	4	24	12	541	577
AAGGTG	3624	3.90324	906	233	60	16	4	24	6	1449	1479
AAAGTT	3623	3.90303	906	233	60	16	4	20	4	1241	1265
AACATG	3609	3.90001	903	232	60	16	4	24	0	908	932
AAACTC	3609	3.90001	903	232	60	16	4	24	0	848	872
ACAGTG	3551	3.88739	888	229	59	16	4	24	2	1347	1373
AATTCC	3530	3.88278	883	228	59	16	4	24	2	865	891
AAACTT	3522	3.88102	881	227	59	16	4	19	0	845	864
ACCAGC	3522	3.88102	881	227	59	16	4	24	28	1518	1570
ACTGAG	3481	3.87194	871	225	59	15	4	24	0	637	661
AACAC	3464	3.86815	866	224	58	15	4	20	68	1269	1357
AAAGTC	3439	3.86255	860	223	58	15	4	23	0	1112	1135
ACAGAT	3434	3.86143	859	223	58	15	4	24	59	1469	1552
AGCCTG	3425	3.8594	857	222	58	15	4	24	0	947	971
AACTTG	3406	3.85511	852	221	58	15	4	24	0	767	791
ACCTGC	3393	3.85216	849	221	58	15	4	24	10	1564	1598
AAAGT	3371	3.84716	843	220	57	15	4	20	34	1482	1536
AACAT	3320	3.83544	830	217	57	15	4	20	84	1608	1712
AAGTCC	3300	3.83081	825	216	57	15	4	24	58	515	597
ATCCC	3283	3.82686	821	215	57	15	4	20	104	1948	2072
AAGC	3268	3.82335	817	214	56	15	4	16	391	2326	2733
C	3219	3.81182	805	212	56	15	4	4	446	1780	2230
AAGTAG	3204	3.80826	801	211	56	15	4	24	0	876	900
ACCCTG	3160	3.79774	790	209	55	15	4	24	70	1666	1760
AGATGC	3150	3.79533	788	208	55	15	4	24	0	1141	1165
ACTCTG	3139	3.79268	785	207	55	15	4	23	20	956	999
AAGCC	3056	3.77241	764	203	54	15	4	20	0	818	838
ACATCC	3011	3.76123	753	201	54	15	4	24	26	1038	1088
ACAGG	2986	3.75497	747	199	53	15	4	20	26	1491	1537
ACATC	2982	3.75396	746	199	53	15	4	20	0	741	761
ACACGC	2982	3.75396	746	199	53	15	4	24	639	3102	3765
ATATC	2972	3.75144	743	199	53	15	4	20	8	1141	1169
ACTAT	2970	3.75093	743	198	53	15	4	20	68	1805	1893
AAGGTC	2952	3.74638	738	197	53	15	4	24	12	770	806
AAGGAC	2947	3.74511	737	197	53	15	4	24	0	875	899
AAGGGC	2937	3.74256	735	197	53	15	4	24	22	927	973
AATACT	2931	3.74103	733	196	53	14	4	24	26	1080	1130
AAGTG	2881	3.72818	721	194	52	14	4	20	0	664	684
AAGAC	2880	3.72792	720	194	52	14	4	20	30	832	882
AACTG	2875	3.72662	719	193	52	14	4	20	2	897	919
AATGC	2858	3.72221	715	192	52	14	4	20	190	1475	1685
AACCAG	2858	3.72221	715	192	52	14	4	24	0	327	351
AACTGG	2853	3.7209	714	192	52	14	4	24	0	478	502
AAGATT	2851	3.72038	713	192	52	14	4	24	1	919	944
AATAGG	2824	3.71331	706	191	52	14	4	24	0	524	548
AAGGC	2778	3.70113	695	188	51	14	4	20	136	1345	1501
ACATGG	2777	3.70086	695	188	51	14	4	23	0	303	326
ACTCAG	2744	3.69203	686	186	51	14	4	24	0	383	407
ACATAG	2730	3.68825	683	186	51	14	4	24	50	783	857
ACCTC	2700	3.68011	675	184	50	14	4	20	0	866	886
AAAGGT	2604	3.65356	651	179	49	14	4	24	2	448	474
ACCCAG	2596	3.65131	649	178	49	14	4	24	12	766	802
AACTTC	2589	3.64934	648	178	49	14	4	20	0	236	256
ACAGTC	2588	3.64906	647	178	49	14	4	24	2	463	489
AACACT	2588	3.64906	647	178	49	14	4	24	62	712	798
AACTCC	2580	3.6468	645	177	49	14	4	24	0	181	205
AACAGT	2578	3.64623	645	177	49	14	4	24	0	593	617
AATGTC	2574	3.6451	644	177	49	14	4	24	0	311	335
AGCATG	2529	3.63227	633	175	48	14	4	24	0	74	98
AATAGC	2521	3.62997	631	174	48	14	4	24	0	563	587
ACTGGG	2489	3.6207	623	172	48	14	4	24	5	492	521
CCCCGG	2486	3.61983	622	172	48	14	4	24	142	1685	1851
AGATCG	2473	3.61604	619	171	48	14	4	14	0	7	21
ATGCCC	2445	3.60781	612	170	47	14	4	24	0	262	286
AATCAC	2425	3.60189	607	169	47	13	4	22	0	264	286
ATATGC	2413	3.59832	604	168	47	13	4	18	146	1319	1483
AAGACC	2406	3.59623	602	168	47	13	4	20	2	140	162
AACCCT	2399	3.59413	600	167	47	13	4	24	466	1958	2448
AAAGCT	2394	3.59263	599	167	47	13	4	24	12	322	358
ACCTCT	2380	3.58842	595	166	47	13	4	24	0	232	256
ACCAGG	2372	3.58601	593	166	47	13	4	24	4	581	609
AACACC	2362	3.58298	591	165	46	13	4	24	24	647	695
AACTAT	2339	3.57597	585	164	46	13	4	23	9	530	562
ACATGT	2337	3.57536	585	164	46	13	4	18	106	1127	1251
AATCT	2337	3.57536	585	164	46	13	4	20	4	675	699
ATGC	2328	3.5726	582	163	46	13	4	12	319	1978	2309
ACACTG	2296	3.56273	574	162	46	13	4	22	0	71	93
ACT	2259	3.55117	565	160	45	13	4	12	314	1208	1534
AATGGC	2229	3.54169	558	158	45	13	4	24	2	248	274
AATCTC	2223	3.53978	556	158	45	13	4	24	0	181	205
ACCT	2210	3.53563	553	157	45	13	4	16	395	1661	2072
AACTGT	2201	3.53274	551	156	45	13	4	24	4	265	293
ACTATC	2199	3.5321	550	156	45	13	4	24	76	873	973
AAGAGT	2153	3.5172	539	154	44	13	4	19	0	54	73
AAGCCC	2152	3.51687	538	153	44	13	4	24	0	275	299
ATATCC	2139	3.51261	535	153	44	13	4	24	55	560	639
AATGGT	2124	3.50767	531	152	44	13	4	24	8	523	555
AAACCT	2086	3.49503	522	150	43	13	4	24	0	112	136
AACCAC	2076	3.49167	519	149	43	13	4	24	23	417	464
AAGAT	2044	3.48084	511	147	43	13	4	20	16	481	517
ACTGGC	2043	3.4805	511	147	43	13	4	24	2	211	237
ACCCCT	2036	3.47811	509	147	43	13	4	24	12	566	602
AAGGAT	1989	3.4619	498	144	42	12	4	24	10	278	312
ACCTGG	1926	3.43969	482	140	41	12	4	24	0	231	255
AACTC	1924	3.43897	481	140	41	12	4	20	3	190	213
AATGCT	1908	3.43324	477	139	41	12	4	24	0	209	233
ACTGCT	1897	3.42927	475	139	41	12	4	24	40	429	493
AATTGC	1895	3.42854	474	139	41	12	4	14	0	14	28
ACTG	1894	3.42818	474	139	41	12	4	16	78	556	650
AAGCAC	1889	3.42637	473	138	41	12	4	24	0	105	129
ACATCT	1879	3.42274	470	138	41	12	4	24	12	292	328
ACAGT	1878	3.42237	470	138	41	12	4	20	10	428	458
ATGCC	1876	3.42164	469	138	41	12	4	20	40	266	326
CCCGG	1875	3.42128	469	138	41	12	4	20	167	937	1124
AAGTAT	1871	3.41982	468	137	40	12	4	22	0	330	352
ACGCCC	1866	3.41799	467	137	40	12	4	20	12	107	139
AATCC	1836	3.40692	459	135	40	12	4	20	89	433	542
AACCTG	1834	3.40618	459	135	40	12	4	24	0	45	69
AACCC	1832	3.40544	458	135	40	12	4	20	4	475	499
AATACC	1827	3.40358	457	135	40	12	4	24	0	31	55
ACCACT	1788	3.38892	447	132	39	12	4	24	123	572	719
ACTGAT	1760	3.37824	440	131	39	12	4	16	0	33	49
ACCAG	1739	3.37014	435	130	39	12	4	20	38	250	308
ACATG	1738	3.36975	435	129	39	12	4	20	0	144	164
AAGCAT	1738	3.36975	435	129	39	12	4	15	0	41	56
AAGCTC	1706	3.35725	427	128	38	12	4	24	0	3	27
AATCCT	1697	3.3537	425	127	38	12	4	24	0	107	131
AGATCC	1670	3.34296	418	125	38	12	4	24	0	85	109
CCCG	1668	3.34216	417	125	38	12	4	16	200	1063	1279
AAGT	1660	3.33895	415	125	38	12	4	16	62	370	448
AATCCC	1647	3.3337	412	124	38	12	4	18	0	49	67
ACAGCT	1638	3.33005	410	123	37	12	4	24	0	50	74
AATGCC	1619	3.32229	405	122	37	12	4	22	0	47	69
AAGTGT	1608	3.31776	402	122	37	12	4	18	0	37	55
AACTGC	1606	3.31694	402	122	37	12	4	18	0	7	25
AACTAC	1599	3.31404	400	121	37	11	4	17	0	44	61
ACCATG	1575	3.30403	394	120	37	11	4	22	0	34	56
AGATC	1573	3.30319	394	120	37	11	4	20	0	27	47
ACTCCT	1568	3.30109	392	119	36	11	4	24	0	63	87
ACTGG	1550	3.29347	388	118	36	11	4	20	47	284	351
ACCTG	1543	3.29049	386	118	36	11	4	16	0	46	62
AAGTC	1543	3.29049	386	118	36	11	4	19	12	63	94
AACTCT	1540	3.28921	385	118	36	11	4	24	0	53	77
AAGTAC	1490	3.26757	373	114	35	11	4	18	0	6	24
AGGCAT	1480	3.26317	370	114	35	11	4	18	0	3	21
AGGATC	1465	3.25653	367	113	35	11	4	21	0	21	42
AGCAT	1450	3.24984	363	112	35	11	4	20	22	299	341
ACTATG	1448	3.24894	362	112	35	11	4	21	0	35	56
AACCAT	1432	3.24173	358	111	35	11	4	24	0	23	47
ACACT	1405	3.22941	352	109	34	11	4	20	21	185	226
AAGTCT	1356	3.20656	339	106	33	11	4	19	0	10	29
AACCTT	1348	3.20277	337	106	33	11	4	19	0	5	24
AAGACT	1345	3.20134	337	106	33	11	4	22	0	14	36
AGCCT	1326	3.19225	332	104	33	11	4	20	56	248	324
ACAGGT	1296	3.17767	324	102	33	11	4	24	0	55	79
ACTCAT	1271	3.16532	318	101	32	11	4	24	0	45	69
ATGGCC	1252	3.1558	313	100	32	10	4	18	10	236	264
AAGCT	1234	3.14667	309	99	32	10	4	19	10	111	140
AAGGT	1228	3.1436	307	98	32	10	4	20	0	62	82
AGAGCT	1221	3.14001	306	98	31	10	4	24	0	31	55
ACTCT	1218	3.13847	305	98	31	10	4	20	8	138	166
ACCTAT	1191	3.12443	298	96	31	10	4	24	32	197	253
AGCGGC	1175	3.11599	294	95	31	10	4	24	112	407	543
AGGGAT	1125	3.089	282	92	30	10	4	24	0	26	50
ACCAT	1119	3.0857	280	91	30	10	4	20	15	146	181
AGGCGC	1113	3.08239	279	91	30	10	4	24	20	262	306
ACCCT	1107	3.07906	277	90	30	10	4	20	4	165	189
CCCGCG	1096	3.07291	274	90	30	10	4	24	44	570	638
AGGAT	1073	3.05991	269	88	29	10	4	20	15	218	253
AGCCAT	1071	3.05876	268	88	29	10	4	24	0	37	61
ATCATG	1055	3.04957	264	87	29	10	4	18	16	113	147
ACTAG	1042	3.04202	261	86	29	10	4	20	3	55	78
AGCCCT	1018	3.02787	255	85	28	10	4	24	8	144	176
ACCGCC	1017	3.02728	255	84	28	10	4	24	98	352	474
AACCT	1014	3.02549	254	84	28	10	4	20	2	59	81
AAGGGT	999	3.01648	250	83	28	10	4	24	0	29	53
AACT	998	3.01588	250	83	28	10	4	16	56	168	240
ACACCT	980	3.00492	245	82	28	10	4	24	1	91	116
AAGGCT	961	2.99318	241	81	27	9	3	18	0	6	24
ACCCAT	960	2.99256	240	81	27	9	3	24	0	40	64
AGCCGC	957	2.99068	240	80	27	9	3	24	21	551	596
CG	935	2.9768	234	79	27	9	3	6	361	1029	1396
ACCGAG	918	2.9659	230	78	27	9	3	15	0	1	16
ACTAGG	914	2.96331	229	78	27	9	3	21	0	15	36
AAGCCT	897	2.9522	225	76	26	9	3	16	2	13	31
AGCGGG	893	2.94957	224	76	26	9	3	24	20	543	587
ACCTAG	887	2.94559	222	76	26	9	3	19	0	15	34
CCGCG	865	2.93083	217	74	26	9	3	20	66	656	742
ACGC	775	2.86714	194	68	24	9	3	16	313	955	1284
AGCCGG	739	2.83999	185	66	23	9	3	24	17	380	421
AGCT	738	2.83922	185	65	23	9	3	12	90	590	692
ACGGGG	732	2.83459	183	65	23	9	3	24	24	344	392
AGATCT	732	2.83459	183	65	23	9	3	18	8	121	147
AGAGCG	702	2.81096	176	63	23	8	3	24	278	377	679
AGCTAT	691	2.8021	173	62	23	8	3	18	4	153	175
AGGGCG	618	2.74022	155	57	21	8	3	24	4	301	329
CCCGGG	603	2.72679	151	56	21	8	3	18	8	410	436
AGCGCC	584	2.70938	146	54	20	8	3	23	2	89	114
AAGCTT	583	2.70846	146	54	20	8	3	15	0	94	109
ACGCGC	583	2.70846	146	54	20	8	3	24	162	533	719
ACGGAG	578	2.70379	145	54	20	8	3	24	69	223	316
ACGGCC	576	2.70192	144	54	20	8	3	24	0	107	131
ACCCCG	542	2.66924	136	51	20	8	3	24	11	194	229
AAAACG	532	2.65932	133	51	19	8	3	16	0	48	64
AGGCCT	503	2.62967	126	48	19	7	3	13	0	20	33
CCGCGG	501	2.62758	126	48	19	7	3	16	14	238	268
AGCCCG	486	2.61165	122	47	18	7	3	24	23	170	217
ACGTGC	468	2.59201	117	46	18	7	3	17	20	450	487
ACGAGG	439	2.55906	110	43	17	7	3	24	26	183	233
ACGTCC	417	2.53288	105	42	17	7	3	24	0	21	45
ACTAGT	410	2.52432	103	41	17	7	3	17	0	31	48
AGGCG	405	2.51813	102	41	16	7	3	20	35	145	200
AGCG	405	2.51813	102	41	16	7	3	16	104	241	361
ACCCGC	399	2.51063	100	40	16	7	3	24	8	72	104
AAGCGG	385	2.49276	97	39	16	7	3	22	1	23	46
CCGGCG	382	2.48886	96	39	16	7	3	17	11	131	159
AACGG	381	2.48756	96	39	16	7	3	20	492	747	1259
ACCGGC	365	2.4663	92	37	16	7	3	13	0	5	18
ACACGG	362	2.46224	91	37	15	7	3	15	0	20	35
AGCGG	361	2.46087	91	37	15	7	3	20	2	125	147
CCGG	358	2.45677	90	37	15	7	3	12	11	200	223
ACGATG	342	2.43441	86	36	15	6	3	16	45	74	135
ACGTAT	336	2.4258	84	35	15	6	3	18	426	532	976
AGCGC	322	2.40524	81	34	14	6	3	20	0	39	59
AGCCG	308	2.38396	77	33	14	6	3	20	1	61	82
ACGGGC	286	2.34888	72	31	13	6	3	14	0	7	21
ACCGGG	279	2.33727	70	30	13	6	3	22	2	28	52
ACACGT	271	2.32371	68	30	13	6	3	23	3	69	95
ACGG	270	2.32199	68	30	13	6	3	16	240	297	553
AAGGCG	267	2.31681	67	29	13	6	3	20	0	6	26
ACGGG	252	2.29017	63	28	13	6	3	20	10	132	162
ACCGTC	251	2.28835	63	28	12	6	3	18	8	54	80
AATCG	245	2.27731	62	27	12	6	3	32	346	474	852
ACCCGG	243	2.27357	61	27	12	6	3	24	1	7	32
ACGCC	236	2.26032	59	27	12	6	3	20	0	31	51
ATCGCC	235	2.2584	59	27	12	6	3	14	0	3	17
ACGCTC	227	2.24281	57	26	12	6	3	18	0	20	38
AAGACG	225	2.23885	57	26	12	6	3	21	24	83	128
ACAGCG	205	2.19755	52	24	11	5	3	14	0	2	16
ACGCAG	204	2.1954	51	24	11	5	3	15	0	5	20
AAAGCG	198	2.18233	50	23	11	5	3	14	4	5	23
AACGGG	184	2.15056	46	22	10	5	3	13	1	1	15
AGCGCG	183	2.14822	46	22	10	5	3	18	0	10	28
AAACG	173	2.12421	44	21	10	5	3	19	17	30	66
ACCGC	168	2.11179	42	20	10	5	3	20	0	6	26
ACGGCG	155	2.07804	39	19	9	5	3	21	26	57	104
AACGAC	140	2.03617	35	18	9	5	3	16	39	5	60
ACG	132	2.01235	33	17	9	5	3	12	102	81	195
AACCGG	126	1.99371	32	16	8	4	2	18	0	6	24
ACGGC	122	1.98089	31	16	8	4	2	15	0	6	21
AAATCG	121	1.97763	31	16	8	4	2	16	0	2	18
ATCCCG	120	1.97435	30	16	8	4	2	18	31	26	75
AACCCG	119	1.97105	30	16	8	4	2	24	55	172	251
ACTCGC	118	1.96772	30	15	8	4	2	14	0	3	17
ACCCG	112	1.94729	28	15	8	4	2	15	1	50	66
AAGTCG	111	1.9438	28	15	8	4	2	13	0	1	14
AACG	108	1.93318	27	14	8	4	2	16	146	152	314
1- Sequence of SSR motif, including reverse complements of the motif.
2- The number of loci in hg38 containing perfect repeats of a given motif used to build SSR-Clouds. Note that this is a subset of the total number of loci containing this motif.
3- This is the number used to define threshold counts of oligonucleotide for each stringency level, calculated by taking the fifth root of the number of loci to be used on building clouds. For example, for a motif with 100,000 loci, the Cloud Threshold Fold-Reduction number is 10, the threshold count for an oligonucleotide in the most stringent cloud set is 100,000/10= 10,000 and so forth.
4- These are the the threshold counts at which an oligonucleotide is inlcuded in a cloud set. Note that clouds 2 through 5 comprise the "mid-stringency" cloud set.
5- These are the number of oligonucleotides within each cloud set that exceeded the threshold counts. Note that the "high stringency" set includes perfect 12-mers and perfect 16-mers of the given motif.
