# Supplementary material for: Finding and extending ancient simple sequence repeat-derived regions in the human genome
Source: Mob DNA. 2020 Feb 17;11:11. doi: 10.1186/s13100-020-00206-y (PMC7027126; doi:10.1186/s13100-020-00206-y)
Supplement: Supplementary file 8 — Additional file 8: Table S3. SSR-clouds recovery of Tandem Repeats Finder (TRF) loci. SSR-clouds loci with a merge distance of 30 bp were divided into 3 nested sets based on the most stringent oligo used to annotate each locus and compared to TRF loci. Comparisons were also made for SSR-clouds loci with FDR ≤ 5%. Cells in the table report the number of SSR-clouds loci that overlap TRF loci and the number of bp within overlapping loci. We also report the number of novel SSR-clouds loci and bp. Recovery percentages are reported relative to the total number of TRF loci in each comparison category (Poly-A: 669,020; (AC)n: 148,607; All Motifs: 2,212,424) and total length in bp of the TRF loci (Poly-A: 18,468,468; (AC)n: 7,403,867; All Motifs: 88,485,889). [file 13100_2020_206_MOESM8_ESM.xlsx]

## Sheet: merge0
		Highest Cloud Stringency of Locus						FDR ≤ %5
		Perfect Repeats		Mid-stringency		Low Stringency
		Loci	bp	Loci	bp	Loci	bp	Loci	bp
Poly-A	SSR-Clouds TRF Intersection	452967	11456790	615785	16008805	665794	17354944	660151	17209029
	Total SSR-Cloud Recovery of TRF	0.67706	0.620343	0.920428	0.866818	0.995178	0.939707	0.986743	0.931806
	Novel Clouds	244608	13318976	35515654	903315	2348525	65094178	1590055	52714179
(AC)n	SSR-Clouds TRF Intersection	120385	4673530	143915	5871478	148027	6271366	148027	6271366
	Total SSR-Cloud Recovery of TRF	0.81009	0.631228	0.968427	0.793029	0.996097	0.847039	0.996097	0.847039
	Novel Clouds	28691	3188467	742448	24760007	1680113	44595076	44595076	1680113
All Motifs	SSR-Clouds TRF Intersection	1738346	57867165	1964039	66587760	2119405	71596437	1939140	67143121
	Total SSR-Cloud Recovery of TRF	0.785724	0.653971	0.887736	0.752524	0.95796	0.809128	0.876482	0.7588
	Novel Clouds	2070465	57053674	2736626	74441046	6841941	149260686	2014804	68007767
Table S3. SSR-clouds recovery of Tandem Repeats Finder (TRF) loci
SSR-clouds loci with a merge distance of 0 bp were divided into 3 nested sets based on the most stringent oligo used to annotate each locus and compared to TRF loci. Comparisons were also made for SSR-clouds loci with FDR ≤ 5%. Cells in the table report the number of SSR-Clouds loci that overlap TRF loci and the number of bp within overlapping loci. We also report the number of novel SSR-clouds l…
